# Supplementary material for: Comparison of Different Tyrosine Kinase Inhibitors for Treatment of Poor Performance Status Patients with EGFR-Mutated Lung Adenocarcinoma
Source: MDPI journal article supplement (doi:10.3390/cancers14030674), 2022-01-28
Supplement: s1 [file s1]

## Supplementary Materials

**Table S1.** The distribution of detailed metastatic sites.

| Variable     | All Patients<br>( <i>n</i> = 517) | Gefitinib<br>( <i>n</i> = 278) | Erlotinib<br>( <i>n</i> = 125) | Afatinib 30 mg<br>( <i>n</i> = 42) | Afatinib 40 mg<br>( <i>n</i> = 72) |
|--------------|-----------------------------------|--------------------------------|--------------------------------|------------------------------------|------------------------------------|
| Lung         | 225 (43.5)                        | 119 (42.8)                     | 56 (44.8)                      | 24 (57.1)                          | 26 (36.1)                          |
| Liver        | 103 (19.9)                        | 53 (19.1)                      | 28 (22.4)                      | 10 (23.8)                          | 12 (16.7)                          |
| Brain        | 234 (45.3)                        | 110 (39.6)                     | 69 (55.2)                      | 15 (35.7)                          | 40 (55.6)                          |
| Bone         | 285 (55.1)                        | 154 (55.4)                     | 68 (54.4)                      | 22 (52.4)                          | 41 (56.9)                          |
| Pleura       | 249 (48.2)                        | 137 (49.3)                     | 62 (49.6)                      | 20 (47.6)                          | 30 (41.7)                          |
| Adrenal      | 50 (9.7)                          | 23 (8.3)                       | 17 (13.6)                      | 3 (7.1)                            | 7 (9.7)                            |
| Distal lymph | 61 (11.8)                         | 33 (11.9)                      | 14 (11.2)                      | 5 (11.9)                           | 9 (12.5)                           |
| Peritoneum   | 3 (0.6)                           | 0 (0.0)                        | 1 (0.8)                        | 0 (0.0)                            | 2 (2.8)                            |
| Pericardium  | 25 (4.8)                          | 12 (4.3)                       | 10 (8.0)                       | 1 (2.4)                            | 2 (2.8)                            |
| Spleen       | 9 (1.7)                           | 8 (2.9)                        | 0 (0.0)                        | 0 (0.0)                            | 1 (1.4)                            |

**Table S2.** Adverse events for any grades.

| Variable                     | All Patients<br>( <i>n</i> = 517) | Gefitinib<br>( <i>n</i> = 278) | Erlotinib<br>( <i>n</i> = 125) | Afatinib 30 mg<br>( <i>n</i> = 42) | Afatinib 40 mg<br>( <i>n</i> = 72) | <i>p</i> Value |
|------------------------------|-----------------------------------|--------------------------------|--------------------------------|------------------------------------|------------------------------------|----------------|
| Any adverse event            | 424 (82.0)                        | 221 (79.5)                     | 94 (75.2)                      | 39 (92.9)                          | 70 (97.2) <sup>a,b</sup>           | <0.001         |
| Diarrhea lesions             | 237 (45.8)                        | 102 (36.7)                     | 41 (32.8)                      | 31 (73.8) <sup>a,b</sup>           | 63 (87.5) <sup>a,b</sup>           | <0.001         |
| Acneiform                    | 62 (12.0)                         | 30 (10.8)                      | 15 (12.0)                      | 6 (14.3)                           | 11 (15.3)                          | 0.662          |
| Paronychia                   | 109 (21.1)                        | 40 (14.4)                      | 18 (14.4)                      | 16 (38.1) <sup>a,b</sup>           | 35 (48.6) <sup>a,b</sup>           | <0.001         |
| Skin lesions                 | 249 (48.2)                        | 110 (39.6)                     | 68 (54.4) <sup>a</sup>         | 24 (57.1)                          | 47 (65.3) <sup>a</sup>             | <0.001         |
| Pruritis                     | 59 (11.4)                         | 37 (13.3)                      | 13 (10.4)                      | 2 (4.8)                            | 7 (9.7)                            | 0.418          |
| Nausea and vomiting          | 51 (9.9)                          | 29 (10.4)                      | 11 (8.8)                       | 4 (9.5)                            | 7 (9.7)                            | 0.980          |
| Constipation                 | 51 (9.9)                          | 40 (14.4)                      | 6 (4.8) <sup>a</sup>           | 1 (2.4)                            | 4 (5.6)                            | 0.003          |
| Dry skin (Xerosis)           | 38 (7.4)                          | 21 (7.6)                       | 10 (8.0)                       | 3 (7.1)                            | 4 (5.6)                            | 0.945          |
| Stomatitis / oral ulcer      | 83 (16.1)                         | 29 (10.4)                      | 12 (9.6)                       | 13 (31.0) <sup>a,b</sup>           | 29 (40.3) <sup>a,b</sup>           | <0.001         |
| Hair loss                    | 4 (0.8)                           | 2 (0.7)                        | 2 (1.6)                        | 0 (0.0)                            | 0 (0.0)                            | 0.732          |
| Hand-foot skin reaction      | 10 (1.9)                          | 5 (1.8)                        | 2 (1.6)                        | 1 (2.4)                            | 2 (2.8)                            | 0.808          |
| Eyes                         | 10 (1.9)                          | 7 (2.5)                        | 0 (0.0)                        | 0 (0.0)                            | 3 (4.2)                            | 0.111          |
| Interstitial lung disease    | 14 (2.7)                          | 9 (3.2)                        | 3 (2.4)                        | 0 (0.0)                            | 2 (2.8)                            | 0.853          |
| Abnormal liver function test | 7 (1.4)                           | 3 (1.1)                        | 2 (1.6)                        | 0 (0.0)                            | 2 (2.8)                            | 0.508          |
| Edema                        | 43 (8.3)                          | 30 (10.8)                      | 7 (5.6)                        | 4 (9.5)                            | 2 (2.8)                            | 0.087          |
| Onchynosis                   | 1 (0.2)                           | 0 (0.0)                        | 0 (0.0)                        | 0 (0.0)                            | 1 (1.4)                            | 0.221          |
| Fatigue                      | 6 (1.2)                           | 2 (0.7)                        | 2 (1.6)                        | 2 (4.8)                            | 0 (0.0)                            | 0.115          |

Abbreviations: “a” indicates  $p < 0.05$  vs. Gefitinib; “b” indicates  $p < 0.05$  vs. Erlotinib.

**Table S3.** Adverse events for grades 3–4.

| Variable                     | All Patients<br>( <i>n</i> = 517) | Gefitinib<br>( <i>n</i> = 278) | Erlotinib<br>( <i>n</i> = 125) | Afatinib 30 mg<br>( <i>n</i> = 42) | Afatinib 40 mg<br>( <i>n</i> = 72) | <i>p</i> Value |
|------------------------------|-----------------------------------|--------------------------------|--------------------------------|------------------------------------|------------------------------------|----------------|
| Any adverse event            | 55 (10.6)                         | 14 (5.0)                       | 13 (10.4) <sup>a</sup>         | 10 (23.8) <sup>a,b</sup>           | 18 (25.0) <sup>a,b</sup>           | <0.001         |
| Diarrhea                     | 17 (3.3)                          | 4 (1.4)                        | 2 (1.6)                        | 2 (4.8)                            | 9 (12.5) <sup>a,b,c</sup>          | <0.001         |
| Acneiform lesions            | 5 (1.0)                           | 3 (1.1)                        | 2 (1.6)                        | 0 (0.0)                            | 0 (0.0)                            | 0.794          |
| Paronychia                   | 18 (3.5)                          | 3 (1.1)                        | 2 (1.6)                        | 5 (11.9) <sup>a,b</sup>            | 8 (11.1) <sup>a,b</sup>            | <0.001         |
| Skin lesions                 | 14 (2.7)                          | 4 (1.4)                        | 5 (4.0)                        | 1 (2.4)                            | 4 (5.6)                            | 0.113          |
| Pruritis                     | 1 (0.2)                           | 1 (0.4)                        | 0 (0.0)                        | 0 (0.0)                            | 0 (0.0)                            | 1.000          |
| Nausea and vomiting          | 0 (0.0)                           | 0 (0.0)                        | 0 (0.0)                        | 0 (0.0)                            | 0 (0.0)                            | NA             |
| Constipation                 | 0 (0.0)                           | 0 (0.0)                        | 0 (0.0)                        | 0 (0.0)                            | 0 (0.0)                            | NA             |
| Dry skin (Xerosis)           | 0 (0.0)                           | 0 (0.0)                        | 0 (0.0)                        | 0 (0.0)                            | 0 (0.0)                            | NA             |
| Stomatitis / oral ulcer      | 10 (1.9)                          | 1 (0.4)                        | 2 (1.6)                        | 4 (9.5) <sup>a</sup>               | 3 (4.2) <sup>a</sup>               | <0.001         |
| Hair loss                    | 0 (0.0)                           | 0 (0.0)                        | 0 (0.0)                        | 0 (0.0)                            | 0 (0.0)                            | NA             |
| Hand-foot skin reaction      | 1 (0.2)                           | 0 (0.0)                        | 0 (0.0)                        | 0 (0.0)                            | 1 (1.4)                            | 0.221          |
| Eyes                         | 0 (0.0)                           | 0 (0.0)                        | 0 (0.0)                        | 0 (0.0)                            | 0 (0.0)                            | NA             |
| Interstitial lung disease    | 1 (0.2)                           | 1 (0.4)                        | 0 (0.0)                        | 0 (0.0)                            | 0 (0.0)                            | 1.000          |
| Abnormal liver function test | 2 (0.4)                           | 1 (0.4)                        | 1 (0.8)                        | 0 (0.0)                            | 0 (0.0)                            | 0.711          |
| Edema                        | 1 (0.2)                           | 0 (0.0)                        | 1 (0.8)                        | 0 (0.0)                            | 0 (0.0)                            | 0.462          |
| Onychinosis                  | 0 (0.0)                           | 0 (0.0)                        | 0 (0.0)                        | 0 (0.0)                            | 0 (0.0)                            | NA             |
| Fatigue                      | 0 (0.0)                           | 0 (0.0)                        | 0 (0.0)                        | 0 (0.0)                            | 0 (0.0)                            | NA             |

Abbreviations: “a” indicates  $p < 0.05$  vs. Gefitinib; “b” indicates  $p < 0.05$  vs. Erlotinib; “c” indicates  $p < 0.05$  vs. Afatinib 30 mg.
